# Supplementary material
Source: publisher figshare collection journal article supplement (https://sage.figshare.com/ndownloader/files/14375921)
Supplement: Supplementary file 1 [file 14375921]

## Supplementary Material

### S1: Statistical Tests for Individual Variables

Given a dataset with variables from all sites, the first step is to conduct appropriate statistical tests, for each variable, to check if there is any site that is different from others. Here, we focus on two published statistical models, namely likelihood ratio test (LRT) and random effects model, for count and continuous variables, respectively.

- **Test based on LRT for Count Variables**

For a binary variable denoting whether a patient may have a serious adverse event (SAE), a non-serious adverse event (NSAE), a protocol deviation, or death, the data from all subjects within a site can be summarized by a count variable ( $Var_j$ ) as shown in Table S1, where the first column represents the site ID, the second column represents the # of patients with at least one event of  $Var_j$ , in each of the sites, and the third column represents the total # of patients in the corresponding site.

Table S1. Data structure for a count variable

| Site ID  | # of patients with $Var_j$ | Total # of patients |
|----------|----------------------------|---------------------|
| 1        | $n_{1j}$                   | $n_{1.}$            |
| $\vdots$ | $\vdots$                   | $\vdots$            |
| $i$      | $n_{ij}$                   | $n_{i.}$            |
| $\vdots$ | $\vdots$                   | $\vdots$            |
| $I$      | $n_{Ij}$                   | $n_{I.}$            |
| Total    | $n_{.j}$                   | $n_{..}$            |

With data described in the above count table, the likelihood ratio test (LRT) method developed by Huang et al.<sup>3</sup> can be applied to identify the sites that are different from the other sites for  $Var_j$ .

We assume that  $n_{ij} \sim^{ind} Pois(n_{i\cdot} p_{ij})$ , and  $n_{\cdot j} - n_{ij} \sim^{ind} Pois((n_{\cdot\cdot} - n_{i\cdot}) q_{ij})$  for all sites  $i = 1, \dots, I$ , where  $p_{ij}$  is the parameter representing the risk/rate of site  $i$  for  $Var_j$  and  $q_{ij}$  is the parameter representing the risk/rate of all the other sites combined, except site  $i$ . For the  $j$ th count variable (i.e.,  $Var_j$ ), we test the global null hypothesis  $H_0 : p_{ij} = q_{ij} = p_0$  for all  $i = 1, \dots, I$ , where  $p_0$  is unknown common value, against the alternative hypothesis  $H_a : p_{ij} > q_{ij}$  for at least one  $i$ .

The likelihood ratio for site  $i$ , fixed at  $Var_j$ , is

$$LR_{ij} = \frac{L_{H_a}}{L_{H_0}} = \frac{(\hat{p}_{ij})^{n_{ij}} (\hat{q}_{ij})^{n_{\cdot j} - n_{ij}}}{(\hat{p}_0)^{n_{\cdot j}}} = \frac{\left(\frac{n_{ij}}{n_{i\cdot}}\right)^{n_{ij}} \left(\frac{n_{\cdot j} - n_{ij}}{n_{\cdot\cdot} - n_{i\cdot}}\right)^{n_{\cdot j} - n_{ij}}}{\left(\frac{n_{\cdot j}}{n_{\cdot\cdot}}\right)^{n_{\cdot j}}} \quad \text{and the log likelihood ratio is}$$

$$LLR_{ij} = n_{ij} \log(\hat{p}_{ij}) + (n_{\cdot j} - n_{ij}) \log(\hat{q}_{ij}) - n_{\cdot j} \log(\hat{p}_0).$$

The likelihood ratio test statistic for testing  $H_0$  versus  $H_a$  is the maximum likelihood ratio ( $MLLR_j$ ) across all sites,  $i = 1, \dots, I$ , where  $\hat{p}_{ij} > \hat{q}_{ij}$ , i.e.  $MLLR_j = \max_i (LLR_i) I(\hat{p}_{ij} > \hat{q}_{ij})$ . A Monte Carlo (MC) simulation is used to obtain the empirical distribution of  $MLLR_j$ . The p-values for each site is determined by ranking the observed  $LLR_{ij}$  in the empirical distribution of  $MLLR_j$ .

- **Test based on Random Effects Model for Continuous Variables**

For continuous variables, such as BMI, blood pressure, baseline continuous biomarker, and medical device success rate, etc., the random effects model developed by Desmet et al.<sup>5</sup> can be applied to identify sites with significantly different values of mean when compared with other

sites. Using a random effects model, for a continuous variable, the outcome for subject  $s$  in site  $i$  is modeled as  $y_{is} = \mu + \gamma_i + \varepsilon_{is}$ , with  $\gamma_i \sim N(0, \tau^2)$ ,  $\varepsilon_{is} \sim N(0, \sigma^2)$ , where  $\mu$  is the fixed effect,  $\gamma_i$  are the site-level random effects, and  $\varepsilon_{is}$  are the random errors. The sample mean for site  $i$  is then

$$y_{i\cdot} = \frac{1}{n_{i\cdot}} \sum_{s=1}^{n_{i\cdot}} y_{is} \sim N\left(\mu, \tau^2 + \frac{\sigma^2}{n_{i\cdot}}\right), \text{ so that } y_{i\cdot} - \mu \sim N\left(0, \tau^2 + \frac{\sigma^2}{n_{i\cdot}}\right). \text{ Let the maximum likelihood}$$

estimates (MLEs) of  $\mu, \tau^2$  and  $\sigma^2$  be  $\hat{\mu}, \hat{\tau}^2, \hat{\sigma}^2$ . The p-value of one-sided test (for

$$H_0 : \mu_i = \mu_0 \text{ vs. } H_a : \mu_i > \mu_0) \text{ for site } i \text{ is calculated as } p_i = P\left(Z \geq \frac{y_{i\cdot} - \hat{\mu}}{\sqrt{\hat{\tau}^2 + \frac{\hat{\sigma}^2}{n_{i\cdot}}}}\right); \text{ and the p-value of}$$

two-sided test (  $H_0 : \mu_i = \mu_0$  vs.  $H_a : \mu_i \neq \mu_0$  ) for site  $i$  is calculated as

$$p_i = 2 * P\left(Z \geq \frac{y_{i\cdot} - \hat{\mu}}{\sqrt{\hat{\tau}^2 + \frac{\hat{\sigma}^2}{n_{i\cdot}}}}\right).$$

In situations where the subject-level data are not available and only site-level summary data are provided, i.e., when for each site  $i$ , only the site size  $n_i$ , sample mean  $y_{i\cdot}$  and sample variance  $s_i^2$  are available, other parameter estimation methods such as ANOVA approach or DerSimonian-Laird (DL) approach<sup>6</sup>, can be used to estimate the reference distribution, and then the corresponding statistical tests for each site and variable pair can be carried out. Lastly, to control the false discovery rate (FDR) across the sites/rows in the presence of multiple comparisons (I), ‘Benjamini Hochberg (BH)’ method<sup>8</sup> is performed, for each variable, to adjust the raw p-values.
